# Supplementary material for: The Effect of Consumer Resistance and Trust on the Intention to Accept Fully Autonomous Vehicles
Source: Hindawi journal article supplement (doi:10.1155/2023/3620148), 2023-10-06
Supplement: f1 [file 3620148.f1.docx]

**Supplementary Materials**

**S**1: Results of EFA and Reliability

| **Construct** | **EFA** |
| --- | --- |
| **Relative Advantage (α=0.911)** | |
| Fully autonomous vehicles will recognize stationary objects such as streetlights, electric poles, guard rails, median strips, and road construction signs better than I do. | .731 |
| Fully autonomous vehicles will recognize moving objects such as vehicles, pedestrians, and animals better than I do. | .626 |
| Fully autonomous vehicles will recognize road signs such as lanes, stop lines, crosswalks, speed bumps, protected areas, slow speeds, and speed limits better than I do. | .683 |
| Fully autonomous vehicles will recognize traffic lights better than I do. | .650 |
| Fully autonomous vehicles will find the optimal route, such as the shortest route to the destination, better than I do. | .777 |
| Fully autonomous vehicles will adjust their direction, such as changing lanes, turning left or right, and overtaking better than I do. | .783 |
| Fully autonomous vehicles will park better than I do. | .691 |
| Fully autonomous vehicles will adjust their speed, such as speeding, stopping abruptly, and driving at a constant speed better than I do. | .770 |
| Fully autonomous vehicles will obey traffic regulations better than I do. | .710 |
| Fully autonomous vehicles will drive in bad weather better than I do. | .718 |
| Fully autonomous vehicles will drive at night better than I do. | .699 |
| **Complexity (α=0.930)** | |
| It will be difficult to operate fully autonomous vehicles. | .869 |
| It will be difficult to learn how to operate fully autonomous vehicles. | .892 |
| The operation method of fully autonomous vehicles will not be simple. | .871 |
| It will be difficult to understand the various functions of fully autonomous vehicles. | .830 |
| It will take a lot of effort to skillfully operate fully autonomous vehicles. | .812 |
| **Suitability (α=0.863)** | |
| Driving fully autonomous vehicles will not require major changes in my driving habits. | .747 |
| Fully autonomous vehicles will not be much different in their operation from non-automated vehicles. | .924 |
| Fully autonomous vehicles will not have many different functions from non-automated vehicles. | .807 |
| **Trialability (α=0.918)** | |
| I can test drive fully autonomous vehicles. | -.880 |
| I can test the technology of fully autonomous vehicles. | -.905 |
| I can test how fully autonomous vehicles can help. | -.911 |
| I can test the functions of fully autonomous vehicles. | -.908 |
| I have heard about the benefits of buying and using fully autonomous vehicles from others. | -.609 |
| **Observability (α=0.867)** | |
| Using fully autonomous vehicles will give others a good impression of me. | .712 |
| Using fully autonomous vehicles will give others the impression that I am ahead. | .776 |
| Using fully autonomous vehicles will give others the impression that I am not behind. | .858 |
| Using fully autonomous vehicles will give others the impression that I am superior. | .801 |
| **Perceived Risk Related to Safety (α=0.824)** |  |
| Fully autonomous cars are unlikely to be safe. | .516 |
| I am afraid that the malfunction of fully autonomous vehicles will cause an accident or send them to the wrong place. | .760 |
| I'm worried that autonomous vehicles will cause more fatal accidents than non-automated vehicles. | .686 |
| Fully autonomous vehicles have a high risk of failure because there are many installed devices. | .591 |
| **Perceived Risk Related to Privacy (α=0.921)** | |
| I am concerned that my location information will be continuously monitored if I use fully autonomous vehicles. | -.798 |
| I am concerned that the system of fully autonomous vehicles will be hacked. | -.872 |
| I am concerned that my privacy will be invaded if I use fully autonomous vehicles. | -.917 |
| I am concerned that personal information will be leaked if I use fully autonomous vehicles. | -.872 |
| **Innovation Propensity (α=0.938)** | |
| I actively look for new things. | .818 |
| I have a strong desire to acquire new knowledge. | .843 |
| I am interested in the latest technology. | .845 |
| I like to experience new things before others. | .828 |
| I tend to embrace new things for the latest technology. | .830 |
| Others ask me for advice on the latest technology. | .769 |
| I can use products or services with the latest technology without the help of others. | .787 |
| I am aware of the latest technological advances in my area of interest. | .766 |
| **Trust (α=0.878)** | |
| I believe fully autonomous vehicles have been verified. | .519 |
| Fully autonomous vehicles will help reduce the risk of accidents. | .735 |
| Fully autonomous vehicles will make the right decisions. | .719 |
| The performance of fully autonomous vehicles is excellent enough to allow users to participate in other activities such as reading books and listening to music while riding in fully autonomous vehicles. | .656 |
| Fully autonomous vehicles will respond appropriately to traffic conditions. | .812 |
| **Resistance (α=0.911)** | |
| Learning new skills to use fully autonomous vehicles is a waste of time. | -.814 |
| It is a waste of money to pay more for fully autonomous vehicles than for existing products. | -.802 |
| I can't understand why other people use fully autonomous vehicles. | -.861 |
| I can't trust fully autonomous vehicle technology. | -.759 |
| Innovation in the field of fully autonomous vehicles is different from the direction I want to improve. | -.837 |
| I think the pace of technological innovation in the field of fully autonomous vehicles is too fast for me to keep up with. | -.741 |
| I think the commercialization of fully autonomous vehicles is too early. | -.582 |
| **Acceptance Intention (α=0.947)** | |
| I am willing to use fully autonomous vehicles. | .901 |
| I plan to use fully autonomous vehicles. | .905 |
| I am willing to introduce fully autonomous vehicles to others around me. | .843 |
| I will actively use the convenience functions of fully autonomous vehicles. | .870 |
| It would be better to use fully autonomous vehicles in my life. | .890 |
